# Supplementary material for: Macrophage migration inhibitory factor exacerbates asthmatic airway remodeling via dynamin-related protein 1-mediated autophagy activation
Source: Springer Nature journal article supplement (doi:10.1186/s12931-023-02526-y), 2023-09-06

# Figure 2

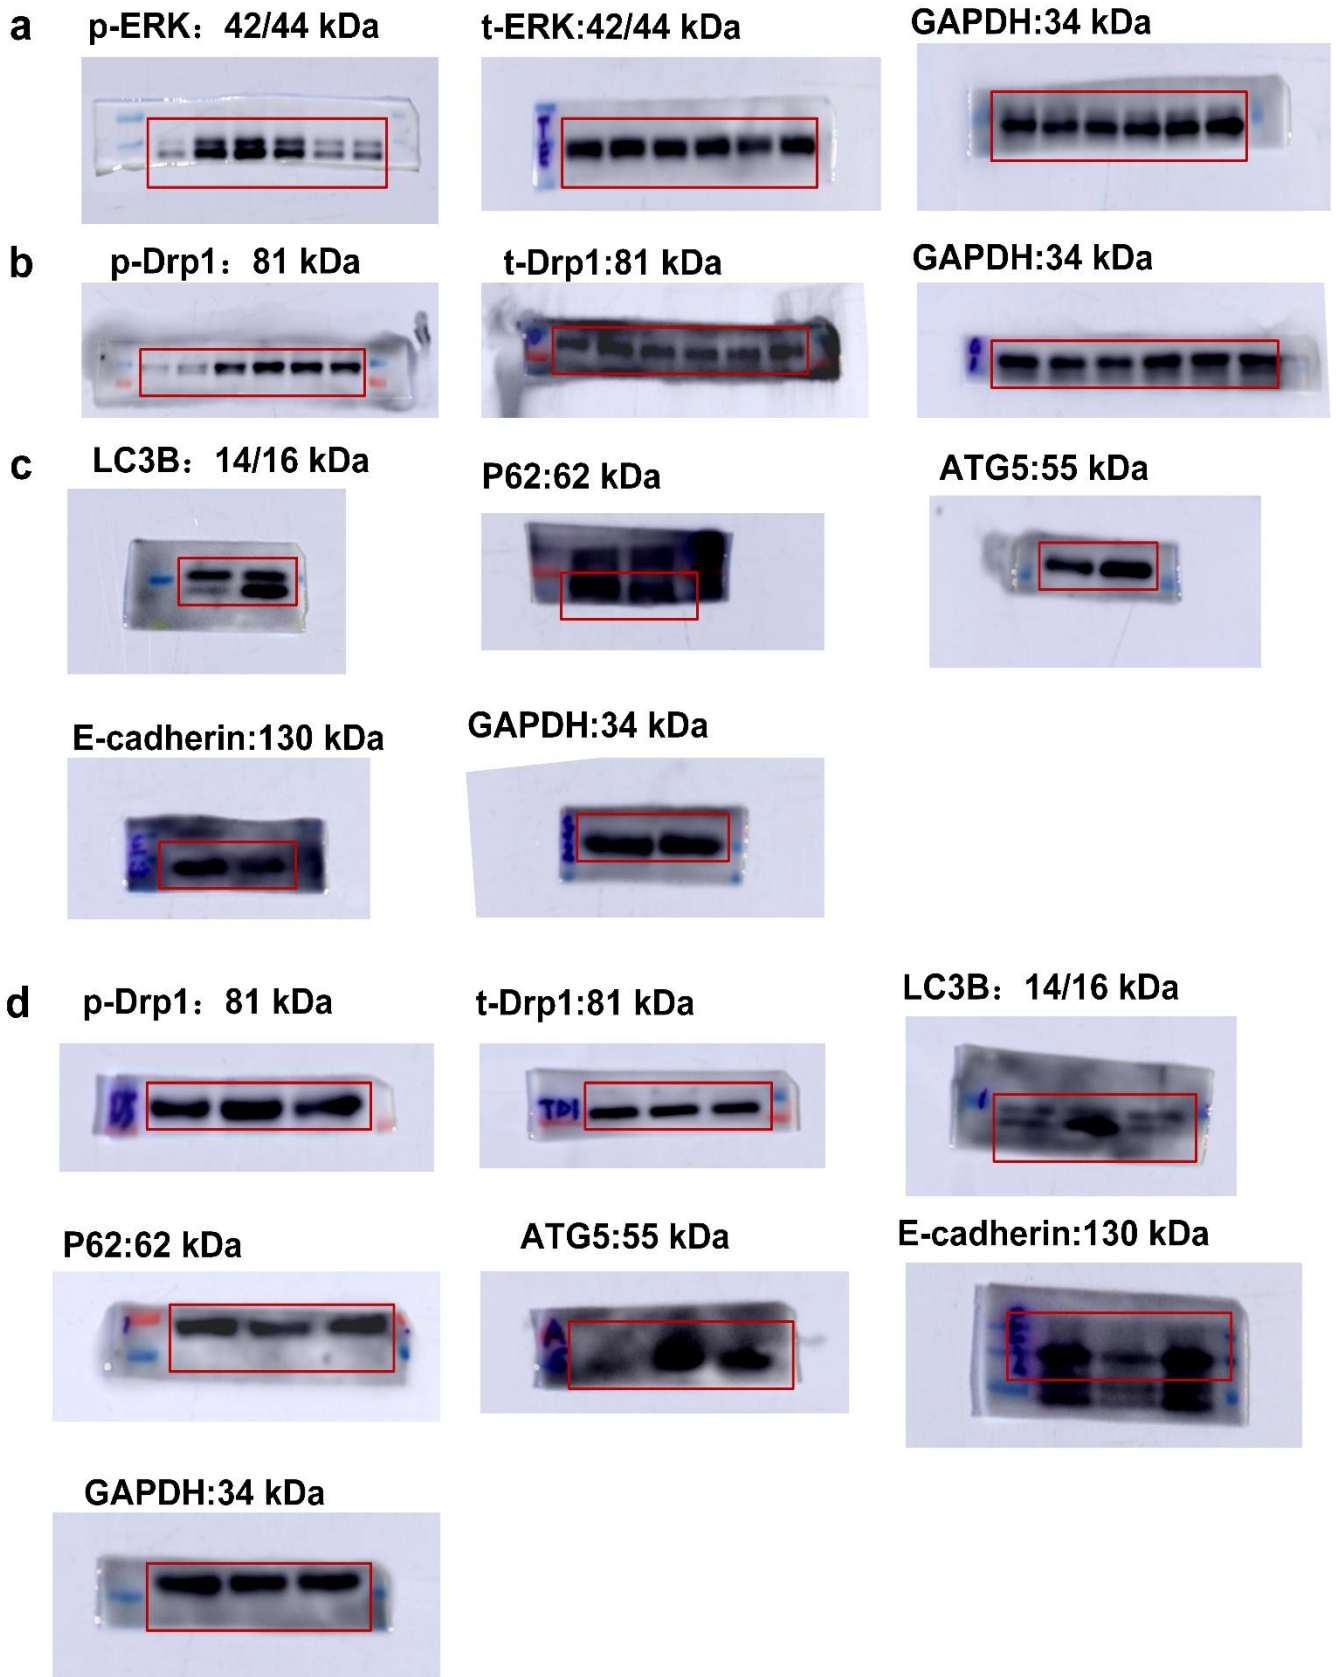

# Figure 3

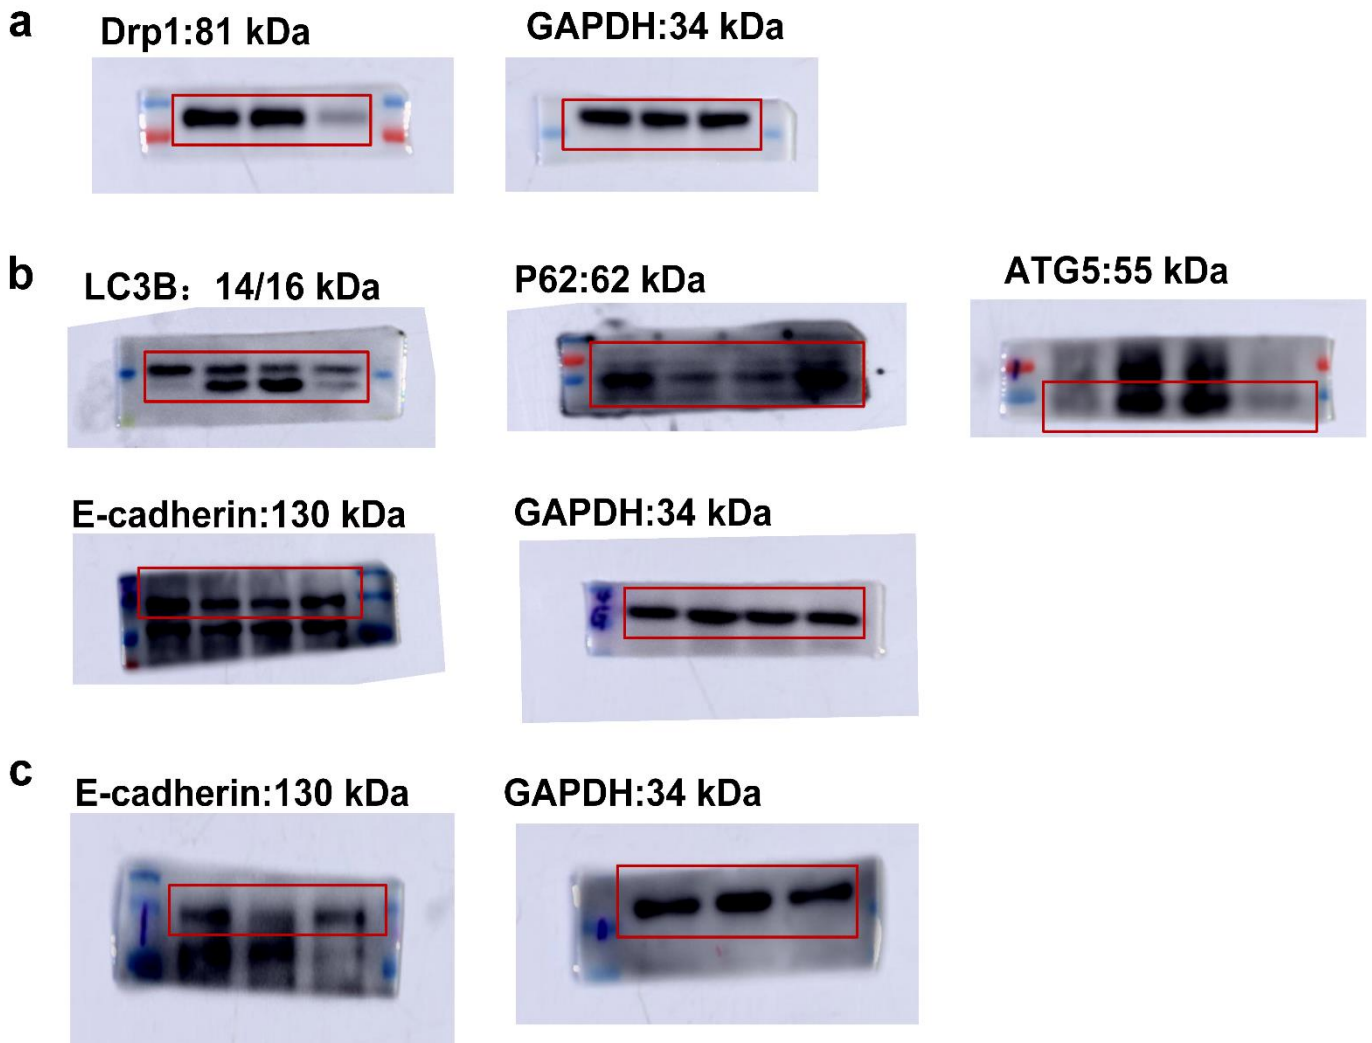

# Figure 6

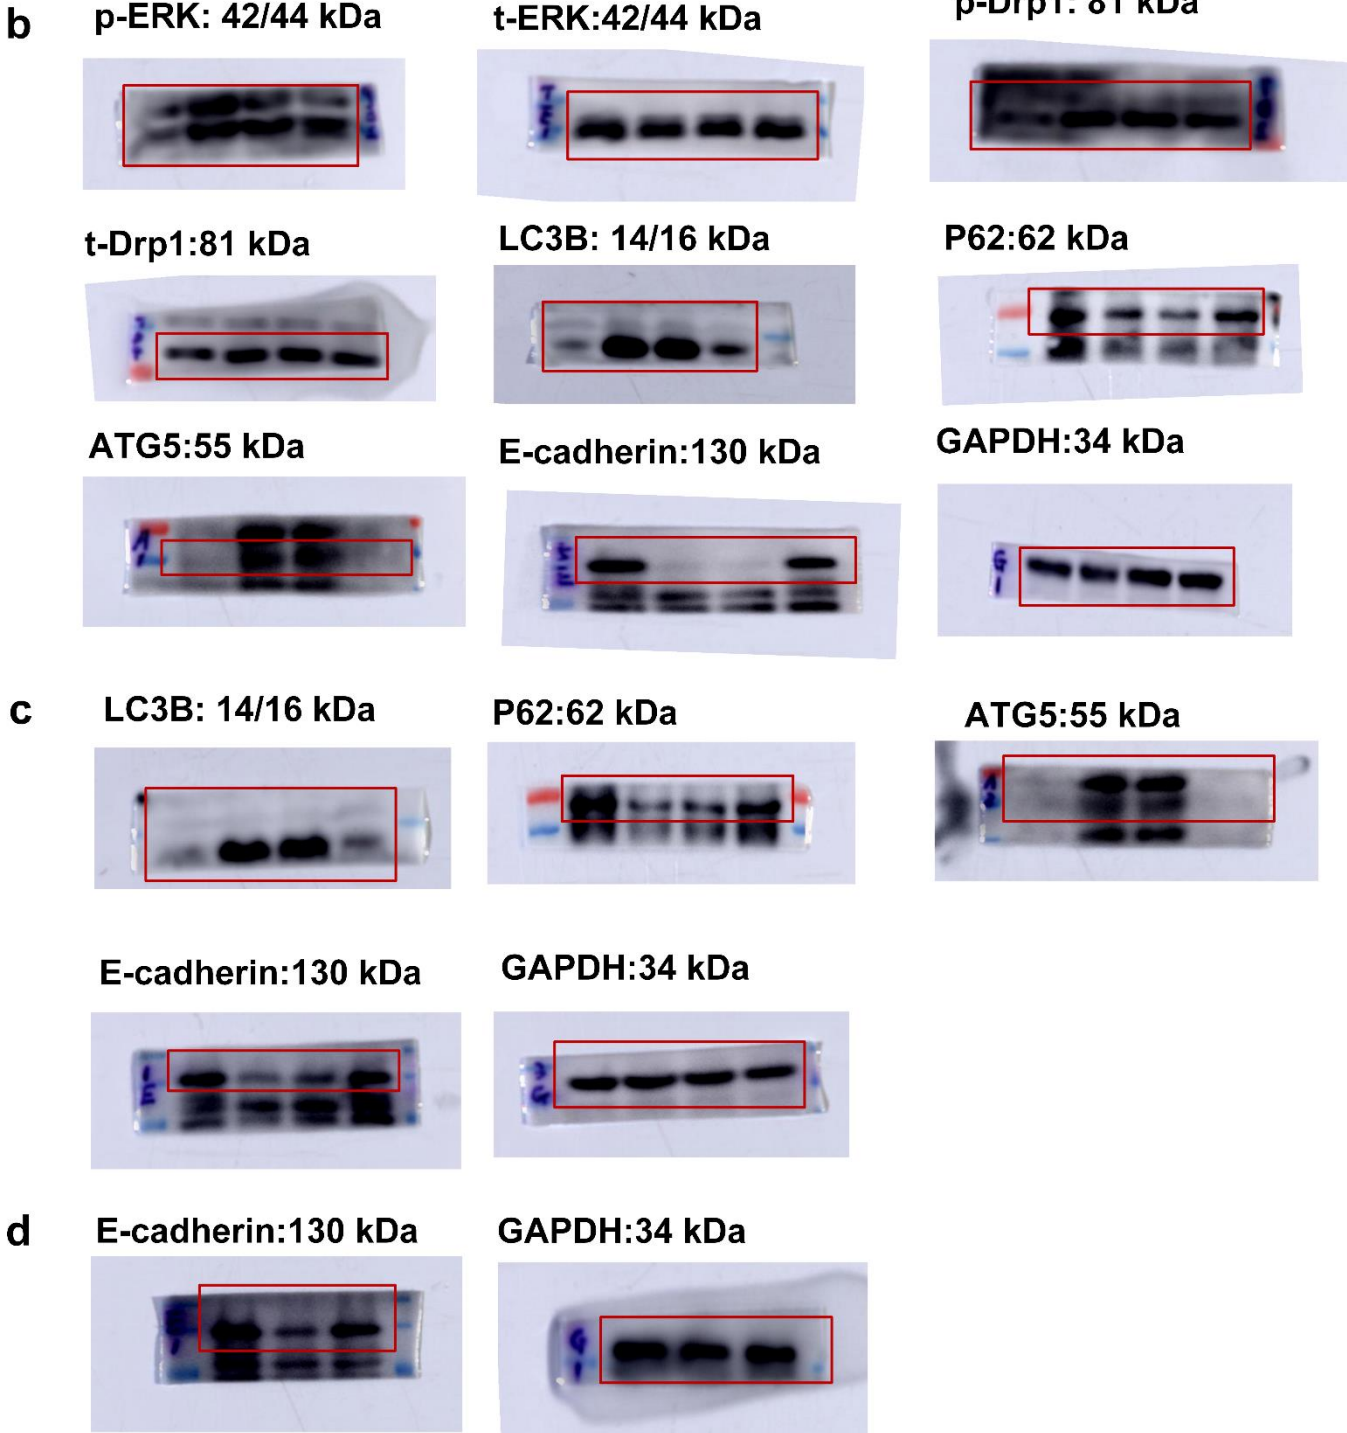

Supplement: MOESM1 [file 26012834]
